# Supplementary material for: Lignin engineering through laccase modification: a promising field for energy plant improvement
Source: PubMed Central journal article supplement (PMC4570640; doi:10.1186/s13068-015-0331-y), 2015-09-15
Supplement: 13068_2015_331_MOESM1_ESM.pdf [file 13068_2015_331_MOESM1_ESM.pdf]

**Table 1 Database accession numbers of laccase sequences for phylogenetic analysis**

| <b>Phylogenetic group</b> | <b>Laccase name</b>              | <b>Accession number</b>          |
|---------------------------|----------------------------------|----------------------------------|
| <b>Plants</b>             | <i>Arabidopsis thaliana</i>      | AtLAC1 [TAIR: AT1G18140]         |
|                           |                                  | AtLAC2 [TAIR: AT2G29130]         |
|                           |                                  | AtLAC3 [TAIR: AT2G30210]         |
|                           |                                  | AtLAC4 [TAIR: AT2G38080]         |
|                           |                                  | AtLAC5 [TAIR: AT2G40370]         |
|                           |                                  | AtLAC6 [TAIR: AT2G46570]         |
|                           |                                  | AtLAC7 [TAIR: AT3G09220]         |
|                           |                                  | AtLAC8 [TAIR: AT5G01040]         |
|                           |                                  | AtLAC9 [TAIR: AT5G01050]         |
|                           |                                  | AtLAC10 [TAIR: AT5G01190]        |
|                           |                                  | AtLAC11 [TAIR: AT5G03260]        |
|                           |                                  | AtLAC12 [TAIR: AT5G05390]        |
|                           |                                  | AtLAC13 [TAIR: AT5G07130]        |
|                           |                                  | AtLAC14 [TAIR: AT5G09360]        |
|                           |                                  | AtLAC15 [TAIR: AT5G48100]        |
|                           |                                  | AtLAC16 [TAIR: AT5G58910]        |
|                           |                                  | AtLAC17 [TAIR: AT5G60020]        |
|                           | <i>Brachypodium distachyon</i>   | BdLAC5 [Phytozome: Bradi1g66720] |
|                           | <i>Brassica napus</i>            | BnTT10-1 [Genbank: AEK27149]     |
|                           | <i>Gossypium arboreum</i>        | GaLAC1 [Genbank: AAR83118]       |
|                           | <i>Populus trichocarpa</i>       | PtLAC3 [EMBL: CAA74103]          |
|                           |                                  | PtLAC90 [EMBL: CAA74104]         |
|                           |                                  | PtLAC110 [EMBL: CAA74105]        |
|                           | <i>Saccharum officinarum</i>     | SofLAC [SUCEST: SCUTST3084C11.g] |
|                           | <i>Zea mays</i>                  | ZmLAC1 [Genbank: AAX83112]       |
|                           |                                  | ZmLAC2 [EMBL: CAJ30498]          |
|                           |                                  | ZmLAC3 [EMBL: CAJ30499]          |
|                           |                                  | ZmLAC4 [EMBL: CAJ30500]          |
|                           |                                  | ZmLAC5 [EMBL: CAJ30497]          |
| <b>Fungi</b>              | <i>Botrytis cinerea</i>          | BcLcc1 [Genbank: AAK77952]       |
|                           |                                  | BcLcc2 [Genbank: AAK77953]       |
|                           | <i>Colletotrichum lagenarium</i> | ClLac1 [Genbank: BAB32575]       |
|                           | <i>Coprinopsis cinerea</i>       | CcLcc1 [Genbank: AAD30964]       |
|                           |                                  | CcLcc2 [Genbank: AAD30965]       |
|                           |                                  | CcLcc3 [Genbank: AAD30966]       |
|                           | <i>Cryphonectria parasitica</i>  | CpLac1 [Genbank: AAA09235]       |
|                           | <i>Melanocarpus albomyces</i>    | MaLac1 [EMBL: CAE00180]          |
|                           | <i>Neurospora crassa</i>         | NcLac1 [Genbank: EAA27703]       |
|                           | <i>Podospora anserina</i>        | PaLac2 [EMBL: CAA70061]          |
|                           | <i>Polyporus ciliatus</i>        | PcLcc3-2 [Genbank: AAG09230]     |
|                           | <i>Pycnoporus cinnabarinus</i>   | PcLac1 [Genbank: AAG13724]       |

---

|                 |                                 |          |                     |
|-----------------|---------------------------------|----------|---------------------|
|                 | <i>Trametes versicolor</i>      | TveLac 1 | [Genbank: BAD98305] |
|                 |                                 | TveLac 2 | [Genbank: BAD98306] |
|                 |                                 | TveLac 3 | [Genbank: BAD98307] |
|                 |                                 | TveLac 4 | [Genbank: BAD98308] |
|                 | <i>Trametes villosa</i>         | TviLcc1  | [Genbank: AAC41686] |
|                 |                                 | TviLcc2  | [Genbank: AAC41687] |
|                 |                                 | TviLcc3  | [Genbank: AAB47733] |
|                 |                                 | TviLcc4  | [Genbank: AAB47734] |
|                 |                                 | TviLcc5  | [Genbank: AAB47735] |
| <b>Insects</b>  | <i>Aedes aegypti</i>            | AaLac1   | [Genbank: AAY29698] |
|                 |                                 | AaLac2   | [Genbank: AAY32604] |
|                 | <i>Bombyx mori</i>              | BmLac2   | [Genbank: BAG70891] |
|                 | <i>Culex pipiens pallens</i>    | CppLac2  | [Genbank: ACG63789] |
|                 | <i>Manduca sexta</i>            | MsLac1   | [Genbank: AAN17506] |
|                 |                                 | MsLac2   | [Genbank: AAN17507] |
|                 | <i>Megacopta punctatissima</i>  | MpLac2   | [Genbank: BAJ83488] |
|                 | <i>Monochamus alternatus</i>    | MaLac2   | [Genbank: ABU68466] |
|                 | <i>Nephotettix cincticeps</i>   | NcLac1S  | [Genbank: BAJ06131] |
|                 |                                 | NcLac1G  | [Genbank: BAJ06132] |
|                 |                                 | NcLac2   | [Genbank: BAJ06133] |
|                 | <i>Nilaparvata lugens</i>       | NIMCO2   | [Genbank: AKN21380] |
|                 | <i>Pimpla hypochondriaca</i>    | PhLac1   | [EMBL: CAD20461]    |
|                 | <i>Reticulitermes flavipes</i>  | RfLacA   | [Genbank: ACX54558] |
|                 |                                 | RfLacB   | [Genbank: ACX54560] |
|                 | <i>Riptortus pedestris</i>      | RpLac2   | [Genbank: BAJ83487] |
|                 | <i>Tribolium castaneum</i>      | TcLac1   | [Genbank: AAX84206] |
|                 |                                 | TcLac2A  | [Genbank: AAX84202] |
|                 |                                 | TcLac2B  | [Genbank: AAX84203] |
| <b>Bacteria</b> | <i>Bacillus subtilis</i>        | BsCotA   | [EMBL:CAB12449]     |
|                 | <i>Bacillus halodurans</i>      | BhLbh1   | [Genbank: AAP57087] |
|                 | <i>Escherichia coli</i>         | EcCueO   | [Genbank: AAC73234] |
|                 | <i>Marinomonas mediterranea</i> | MmPpoA   | [Genbank: AAF75831] |
|                 | <i>Oceanobacillus iheyensis</i> | OiCotA   | [Genbank: BAC13302] |
|                 | <i>Pseudomonas putida</i>       | PpCumA   | [Genbank:AAD24211]  |
|                 | <i>Streptomyces griseus</i>     | SgEpoA   | [Genbank: BAB64332] |
|                 | <i>Streptomyces lavendulae</i>  | SISTSL   | [Genbank: BAC16804] |

---
